# Supplementary material for: Self-assembly and recognition properties of a tetraanionic macrocyclic boronate ester in aqueous medium
Source: Royal Society of Chemistry journal article supplement (doi:10.1039/c5ra03291a), 2015-01-01
Supplement: c5ra03291a1.pdf [file c5ra03291a1.pdf]

## Self-assembly and recognition properties of a tetraanionic macrocyclic boronate ester in aqueous medium

Mayte A. Martínez-Aguirre, Jorge M. del Campo, Sigfrido Escalante-Tovar and Anatoly K. Yatsimirsky\*

Facultad de Química, Universidad Nacional Autónoma de México, 04510 México D.F., México.  
E-mail: anatoli@unam.mx

### Table of contents

|                                                                                                                                      | Page |
|--------------------------------------------------------------------------------------------------------------------------------------|------|
| <b>Fig. 1S.</b> $^{11}\text{B}$ NMR spectrum of <b>3</b>                                                                             | 2    |
| <b>Fig. 2S.</b> $^{13}\text{C}$ NMR spectrum of <b>3</b>                                                                             | 2    |
| <b>Fig. 3S.</b> ROESY $^1\text{H}$ spectrum of <b>3</b>                                                                              | 3    |
| <b>Fig. 4S.</b> Potentiometric titrations of <b>1</b> , <b>2</b> and their equimolar mixture                                         | 3    |
| <b>Table 1S.</b> Logarithms of equilibrium constants $\beta_{pqr}$ for interactions between <b>1</b> and <b>2</b> in 50% DMSO        | 4    |
| <b>Fig. 5S.</b> $^1\text{H}$ NMR spectra of the equimolar mixture <b>1</b> and <b>2</b> with various equivalents of NaOH in 50% DMSO | 5    |
| <b>Fig. 6S.</b> NOESY $^1\text{H}$ spectrum of the complex of <b>3</b> and $\text{Pr}_4\text{N}^+$                                   | 7    |
| <b>Fig. 7S.</b> ROESY $^1\text{H}$ spectrum of the complex of <b>3</b> and $\text{Pr}_4\text{N}^+$                                   | 7    |
| <b>Fig. 8S – 10S.</b> Titration plots of <b>3</b> by different cationic guests                                                       | 8-10 |
| <b>Table 2S.</b> Computed total energies of <b>3</b> and its complexes                                                               | 10   |
| <b>Table 3S.</b> Cartesian coordinates for calculated structures                                                                     | 11   |

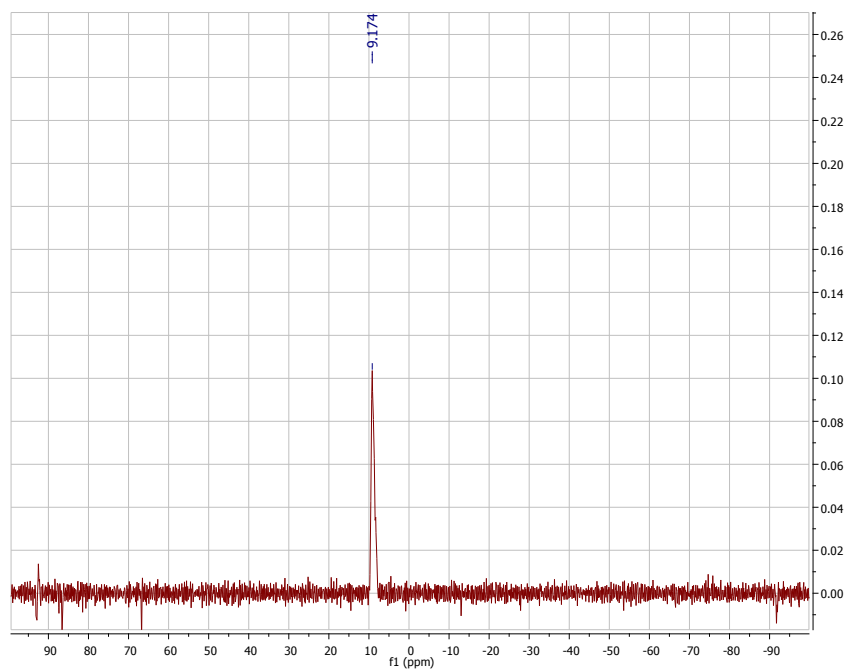

Fig. 1S.  $^{11}\text{B}$  NMR spectrum of **3** prepared by mixing 40 mM **1**, 40 mM **2** and 80 mM NaOH in 5% vol. DMSO- $\text{d}_6/\text{D}_2\text{O}$ .

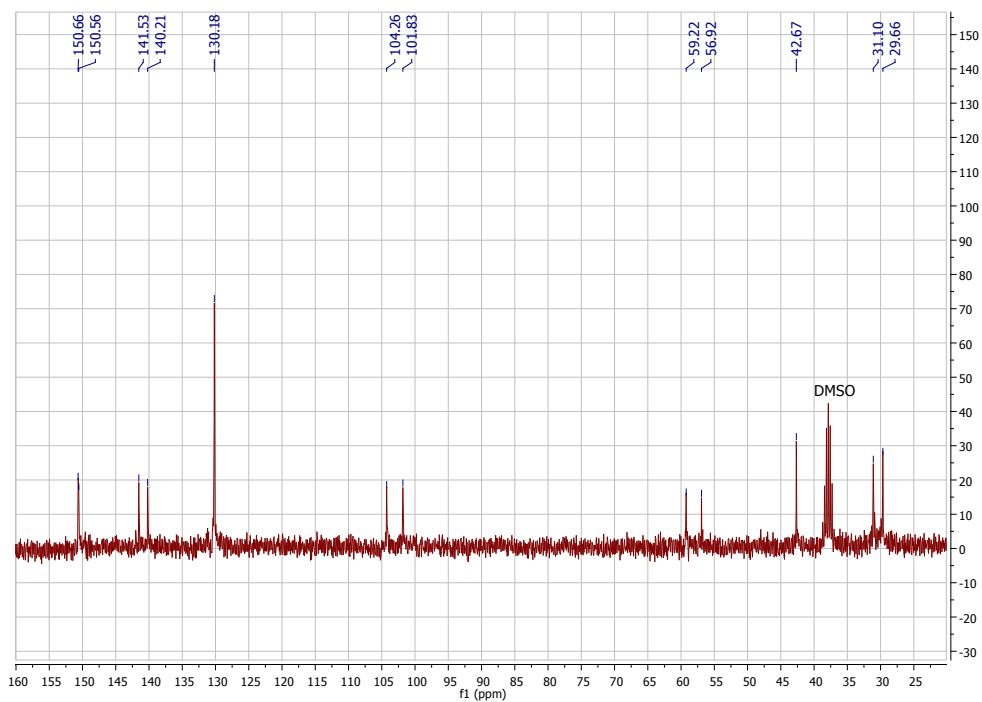

Fig. 2S.  $^{13}\text{C}$  NMR spectrum of **3** prepared by mixing 40 mM **1**, 40 mM **2** and 80 mM NaOH in 5% vol. DMSO- $\text{d}_6/\text{D}_2\text{O}$ .

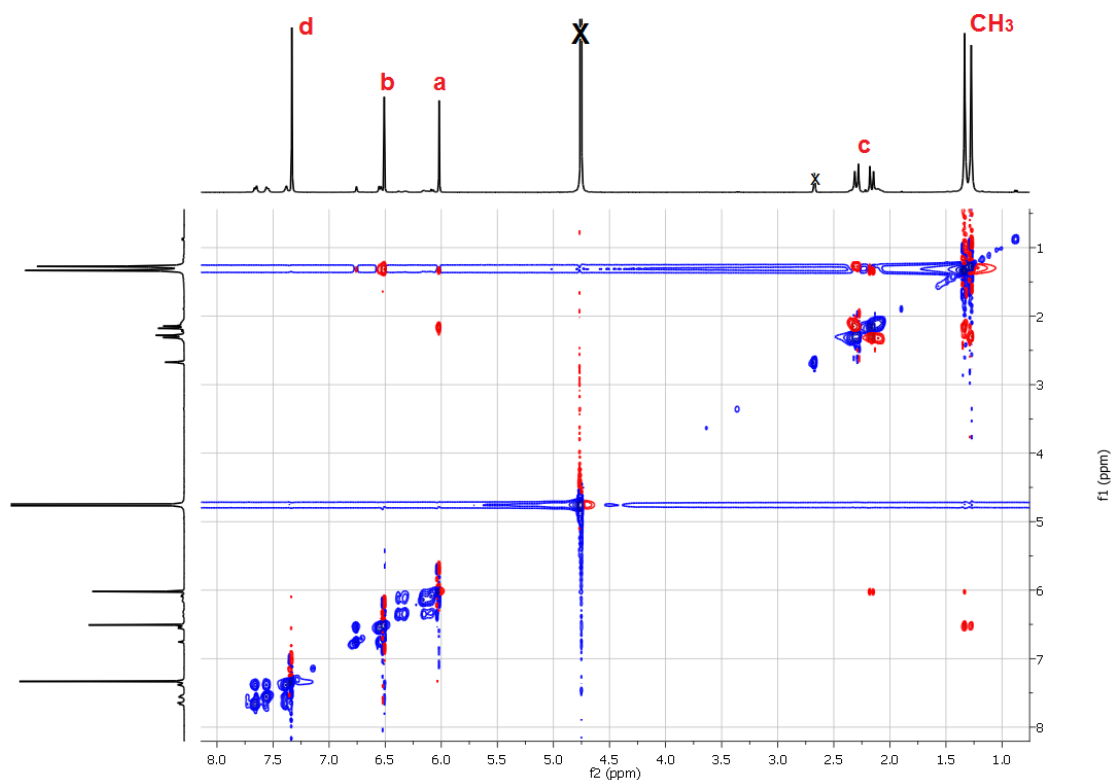

Fig. 3S. ROESY  $^1\text{H}$  spectrum of **3** prepared by mixing 10 mM **1**, 10 mM **2** and 20 mM NaOH in 5% vol. DMSO- $d_6$ /D $_2$ O. Crossed peaks belong to residual solvent signals.

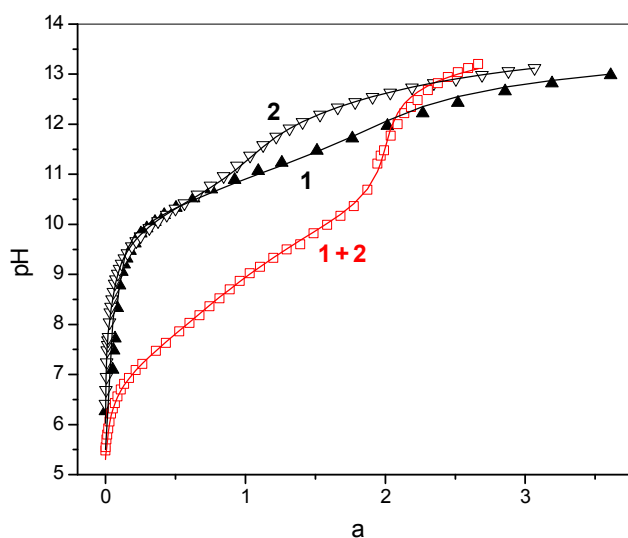

Fig. 4S. Potentiometric titrations of **1** (solid triangles), **2** (open triangles) and the equimolar mixture of **1** and **2** (open red squares) in 50% DMSO/water containing 0.05 M NaCl as a background electrolyte; “a” is the number of equivalents of NaOH. Solid lines are theoretical fitting curves generated by Hyperquad 2003.

The titration results were fitted to a traditional “ $pqr$ ” scheme, reaction (1S), where A is the neutral form of diboronic acid **2** ( $R(B(OH)_2)_2$ ), S is the neutral form of dicatechol **1** ( $R'(OH)_4$ ) and H is proton.

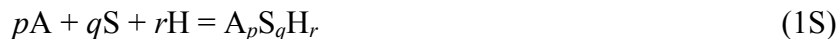

The values of  $p$  and  $q$  ranging from 1 to 3 and values of  $r$  ranging from 1 to 6 were tested in different combinations and the best fit was obtained assuming formation of species  $ASH_{-1}$ ,  $A_2S_2H_{-3}$  and  $A_2S_2H_{-4}$  (note that  $H_{-1}$  in this formalism is equivalent of bound hydroxide anion). The logarithms of equilibrium constants  $\beta_{pqr}$  corresponding to the equation (1) are given in Table 1S.

Table 1S. Logarithms of equilibrium constants  $\beta_{pqr}$  corresponding to the equation (1) for dissociation of diboronic acid **2**, dicatechol **1** and formation of boronate esters.

| $p$ | $q$ | $r$ | $\log\beta_{pqr}$ | reaction                                                                                                    |
|-----|-----|-----|-------------------|-------------------------------------------------------------------------------------------------------------|
| 1   | 0   | -1  | -10.43±0.05       | $R(B(OH)_2)_2 = R(B(OH)_2)(B(OH)_3)^- + H^+$                                                                |
| 1   | 0   | -2  | -22.91±0.06       | $R(B(OH)_2)_2 = R(B(OH)_3)_2^{2-} + 2H^+$                                                                   |
| 0   | 1   | -1  | -10.45±0.03       | $R'(OH)_4 = R'(OH)_3(O)^- + H^+$                                                                            |
| 0   | 1   | -2  | -21.87±0.05       | $R'(OH)_4 = R'(OH)_2(O)_2^{2-} + 2H^+$                                                                      |
| 1   | 1   | -1  | -5.01±0.02        | $R'(OH)_4 + R(B(OH)_2)_2 = (HO)_2R'(O)_2B(OH)R(B(OH)_2)^- + H^+$                                            |
| 2   | 2   | -3  | -16.87±0.07       | $2R'(OH)_4 + 2R(B(OH)_2)_2 =$<br>$(HO)_2R'(O)_2B(OH)RB(O)_2(OH)R'(O)_2B(OH)R(B(OH)_2)^{3-} + 3H^+$          |
| 2   | 2   | -4  | -26.78±0.05       | $2R'(OH)_4 + 2R(B(OH)_2)_2 =$<br>$\overbrace{(O)_2R'(O)_2B(OH)RB(O)_2(OH)R'(O)_2B(OH)R(B(OH))}^{4-} + 4H^+$ |

The final  $A_2S_2H_{-4}$  complex  $\overbrace{(O)_2R'(O)_2B(OH)RB(O)_2(OH)R'(O)_2B(OH)R(B(OH))}^{4-}$  which is a predominant species in the presence of 2 equivalents of added hydroxide corresponds to **3**. The  $ASH_{-1}$  complex  $(HO)_2R'(O)_2B(OH)R(B(OH)_2)^-$  is a predominant species at  $a=1$  which corresponds to initially formed boronate ester between one catechole group of **1** and one boronic acid group of **2**, structure **4S**. The  $A_2S_2H_{-3}$  complex  $(HO)_2R'(O)_2B(OH)RB(O)_2(OH)R'(O)_2B(OH)R(B(OH)_2)^{3-}$  has its maximum concentration about 40% of total **1** and **2** at  $a=1.5$  and probably has the structure **5S** shown below.

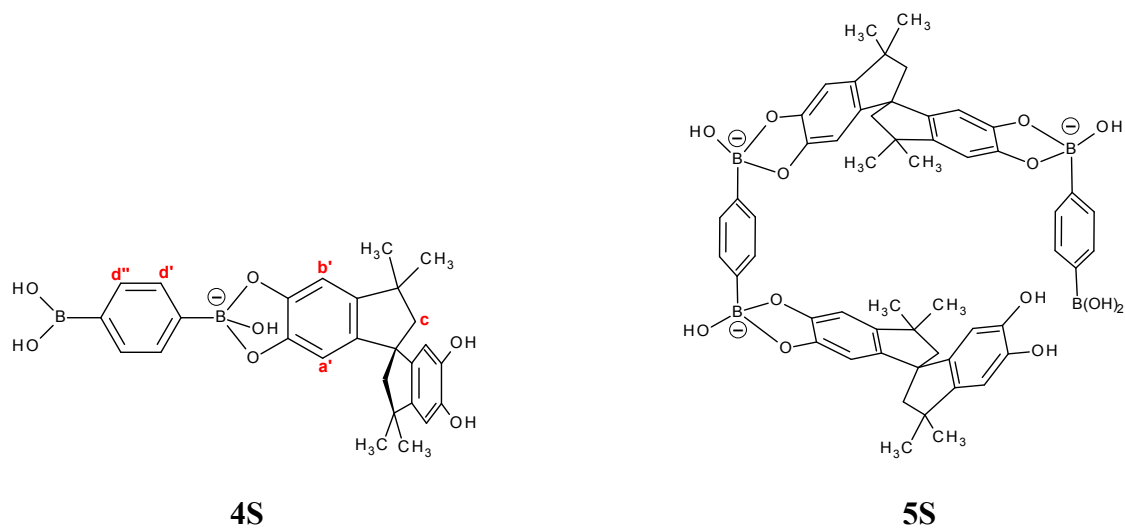

The formation of intermediate complexes was confirmed by  $^1\text{H}$  NMR results. Figure 5S shows  $^1\text{H}$  NMR spectra of a 1:1 mixture of **1** and **2** at increased amounts of added NaOH, which induces formation of tetrahedral anionic boronate ester links.

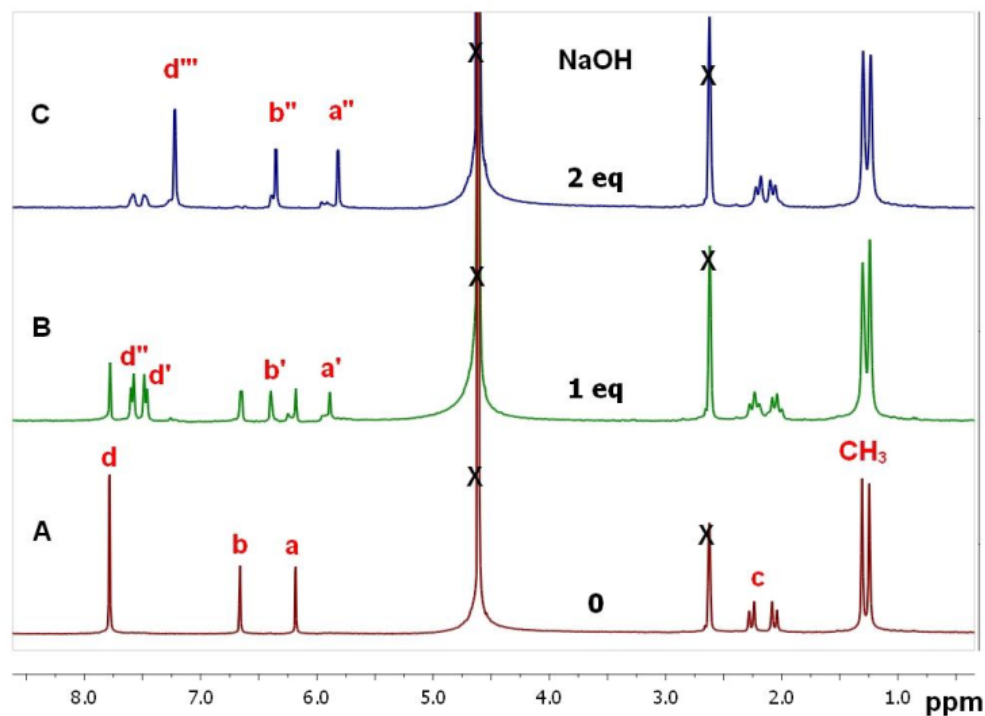

**Figure 5S.**  $^1\text{H}$  NMR spectra (50% vol.  $\text{DMSO-d}_6/\text{D}_2\text{O}$ ) of the equimolar mixture **1** and **2** (10 mM each) with various equivalents of NaOH. Crossed peaks belong to residual solvent signals.

In the absence of added base (Figure 5SA) one observes a singlet of 4 equivalent phenylene protons of **2** at 7.78 ppm, two singlets of “a” and “b” aromatic protons of **1** and multiplets of methylene and methyl protons of **1**. In the presence of 1 equivalent of NaOH two sets of signals of aromatic protons are clearly seen: one belongs to starting compounds and the other one may be attributed to a 1:1 boronate ester **4S** expected to be the principal product in these conditions. The second set involves a double doublet at 7.5 ppm, which can be attributed to phenylene protons d', d'' in the ester **4S** with non-equivalent boronic acid groups one of which is converted to the boronate ester. There are also two up-field shifted signals of aromatic protons a' and b' which can be attributed to the esterified catechol ring in **4S**. Signals of methyl groups remain unchanged, but methylene signals have increased multiplicity indicating the presence of a mixture of compounds. After addition of the second equivalent of NaOH one observes again a single set of signals with a small proportion of signals at 7.5 ppm which belong to traces of **4S**. The phenylene protons of diboronic acid now give a singlet signal shifted up-field by 0.6 ppm in respect of the signal of free acid. This is in agreement with formation of a bisboronate ester with equivalent anionic boronate groups. Aromatic signals of **1** also are shifted up-field by ca. 0.3 ppm and signals of aliphatic protons remain practically unchanged.

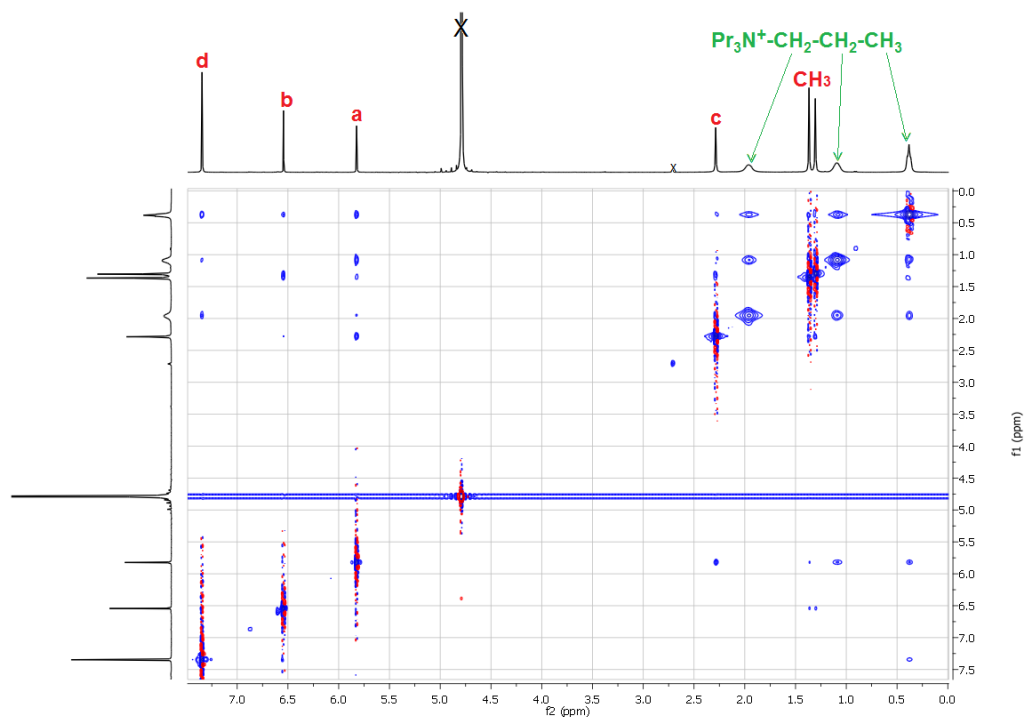

Fig. 6S. NOESY <sup>1</sup>H spectrum of the complex of **3** and  $\text{Pr}_4\text{N}^+$  prepared by mixing 40 mM **1**, 40 mM **2**, 80 mM NaOH and 20 mM  $\text{Pr}_4\text{NCl}$  in 5% vol.  $\text{DMSO-d}_6/\text{D}_2\text{O}$ . Crossed peaks belong to residual solvent signals.

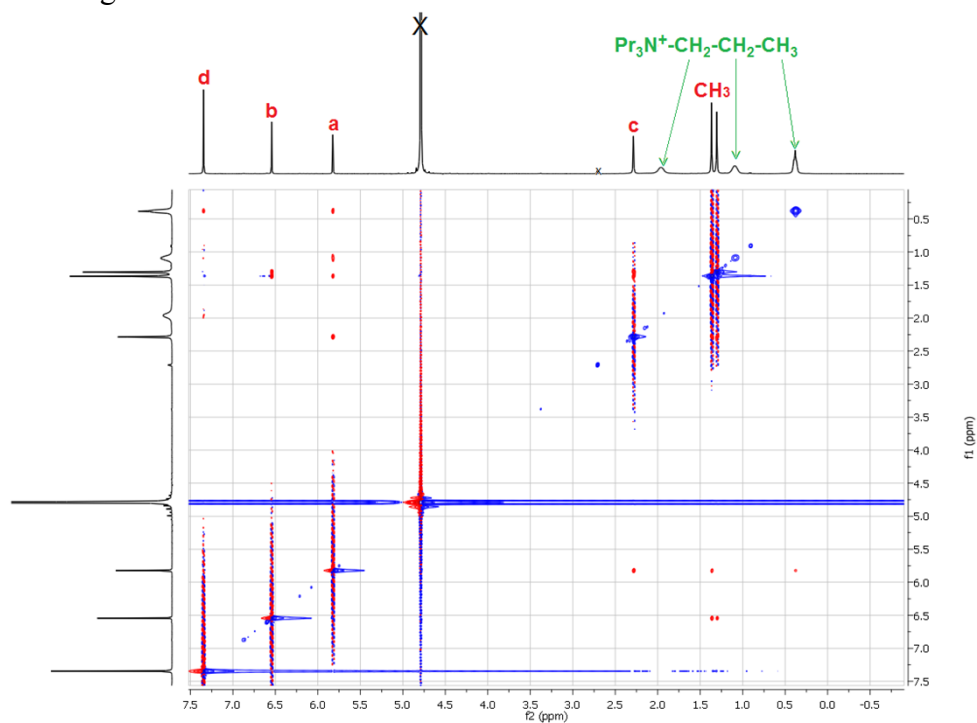

Fig. 7S. ROESY <sup>1</sup>H spectrum of the complex of **3** and  $\text{Pr}_4\text{N}^+$  prepared by mixing 40 mM **1**, 40 mM **2**, 80 mM NaOH and 20 mM  $\text{Pr}_4\text{NCl}$  in 5% vol.  $\text{DMSO-d}_6/\text{D}_2\text{O}$ . Crossed peaks belong to residual solvent signals.

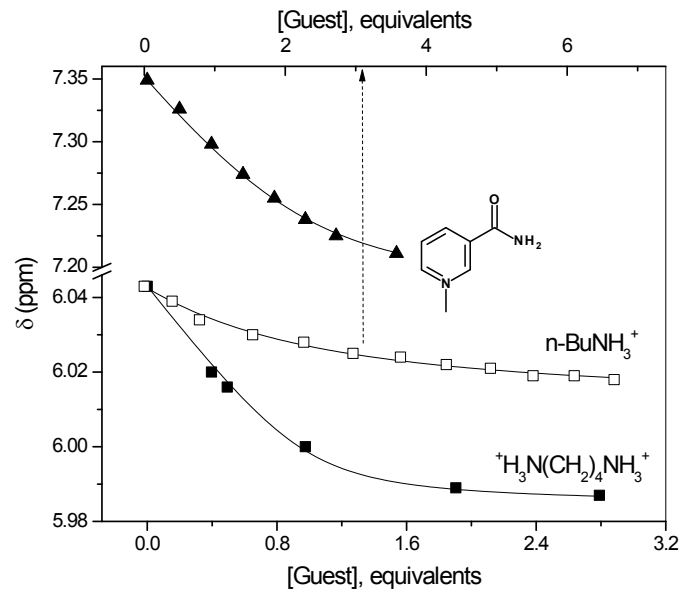

Fig. 8S. Titration plots of 2.5 mM **3** prepared by mixing of 5 mM **1** with 5 mM **2** and 10 mM NaOH in D<sub>2</sub>O containing 5% vol DMSO-d<sub>6</sub> by different cationic guests. The guest concentration is given as number of equivalents to total **3**.



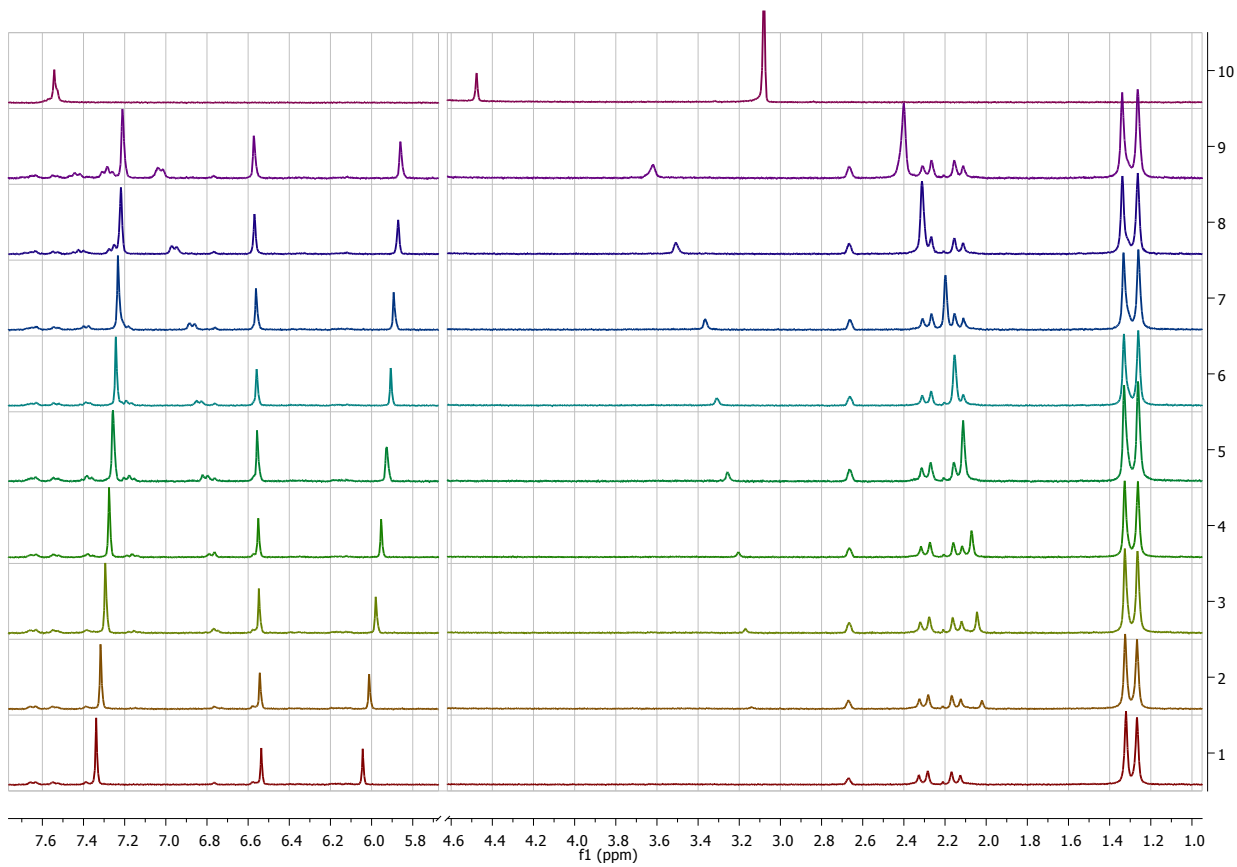

Fig. 9S.  $^1\text{H}$  NMR titration of 2.5 mM **3** by N-benzyltrimethylammonium. Concentrations of N-benzyltrimethylammonium: (1) – 0; (2) – 0.5 mM; (3) - 1.0 mM; (4) – 1.5 mM; (5) – 2.0 mM; (6) – 2.5 mM; (7) – 3.0 mM; (8) – 4.0 mM; (9) – 5.0 mM; (10) – free N-benzyltrimethylammonium.

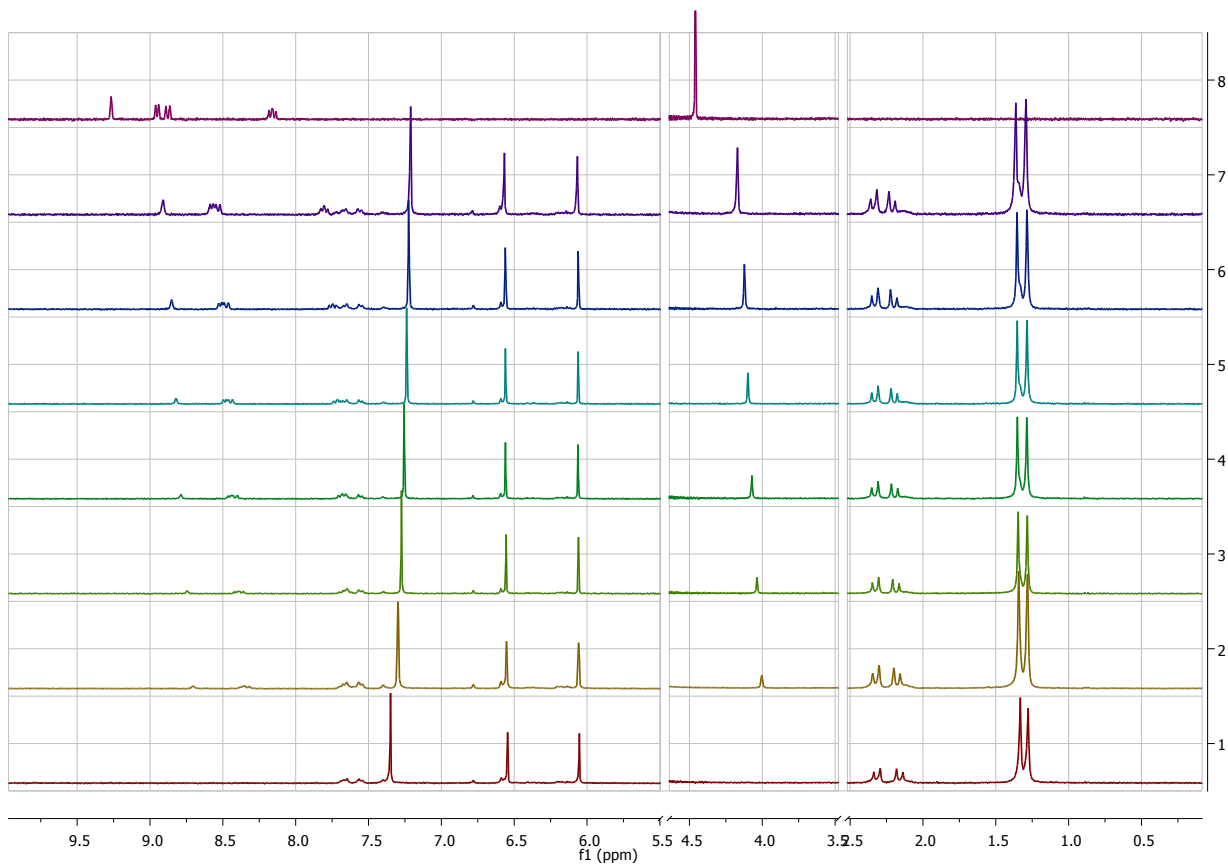

Fig. 10S.  $^1\text{H}$  NMR titration of 2.5 mM **3** by 1-methylnicotinamide. Concentrations of 1-methylnicotinamide: (1) – 0; (2) – 1.0 mM; (3) – 1.5 mM; (4) – 2.0 mM; (5) – 2.5 mM; (6) – 3.0 mM; (7) – 4.0 mM; (8) – free 1-methylnicotinamide.

Table 2S. Computed total energies in au obtained with TeraChem for PBE/6-311++G\*\* method and PBE0/6-311G\*\* method for Berberine

|                              | $\text{Pr}_4\text{N}^+$ | $\text{Et}_4\text{N}^+$ | $\text{Me}_4\text{N}^+$ | Berberine    |
|------------------------------|-------------------------|-------------------------|-------------------------|--------------|
| Free guest                   | -528.062955             | -370.991238             | -213.913457             | -1127.379119 |
| Free $\text{Na}_4\mathbf{3}$ | -3737.689875            | -3737.689875            | -3737.689875            | -3737.644457 |
| Complex                      | -4265.822007            | -4108.752507            | -3951.683174            | -4865.360458 |
| Interaction                  | -0.0692                 | -0.0714                 | -0.0798                 | -0.3369      |

Table 3S. Cartesian coordinates for calculated structures.

Na<sub>4</sub>3

|   |               |                |               |
|---|---------------|----------------|---------------|
| C | 17.0219436983 | -11.5223646892 | -1.4162247263 |
| C | 17.4035582364 | -11.8757421298 | -0.1019860276 |
| C | 17.7363385185 | -10.8149992859 | 0.7647980628  |
| C | 17.6486722987 | -9.4752605458  | 0.3510453332  |
| C | 17.2602263600 | -9.1200303154  | -0.9610249605 |
| C | 16.9654847308 | -10.1890015762 | -1.8355433283 |
| B | 17.2925315518 | -13.3981421148 | 0.4256900403  |
| O | 18.4480859334 | -13.6839733274 | 1.3445921082  |
| B | 17.1643373424 | -7.5835332908  | -1.4760075996 |
| O | 15.8368211232 | -7.1961920834  | -1.9971504895 |
| C | 15.4075007537 | -6.1230743992  | -1.2831227770 |
| C | 16.3489104880 | -5.7388140610  | -0.3005342988 |
| C | 16.1326590805 | -4.6566591242  | 0.5437668219  |
| C | 14.9059592828 | -3.9717560378  | 0.4070909681  |
| C | 13.9523181187 | -4.3813421387  | -0.5313668107 |
| C | 14.1909691683 | -5.4600895319  | -1.4057689110 |
| C | 12.6815699253 | -3.5425697975  | -0.4631778322 |
| C | 12.9251613298 | -2.7024643842  | 0.8373292787  |
| C | 14.4511558498 | -2.7232736213  | 1.1552376211  |
| C | 12.4273943792 | -2.7099647335  | -1.7644223680 |
| C | 10.8951556511 | -2.7172239742  | -2.0601662608 |
| C | 10.4342867521 | -3.9495775054  | -1.2879341332 |
| C | 11.4089196976 | -4.3764257677  | -0.3792294469 |
| C | 9.1869831874  | -4.6052592877  | -1.3767776386 |
| C | 8.9703546204  | -5.6803297567  | -0.5201929198 |
| C | 9.9439072019  | -6.0855010551  | 0.4218747571  |
| C | 11.1790042355 | -5.4519447709  | 0.4997751528  |
| O | 7.8679783602  | -6.4977940844  | -0.4483454033 |
| B | 8.1524536653  | -7.5094081657  | 0.7310467200  |
| O | 7.1478557579  | -7.2072938011  | 1.8130105963  |
| O | 9.5161215042  | -7.1364898723  | 1.1736341818  |

C 10.6152609133 -2.8108758012 -3.5707800709  
C 10.2092358631 -1.4512597904 -1.4954200200  
C 14.7108994265 -2.7933868486 2.6708346192  
C 15.1601542299 -1.4759912018 0.5776798603  
O 17.4247764497 -6.5900732592 -0.3194303866  
O 18.3131678268 -7.2936243324 -2.4240074120  
C 7.9687958727 -9.0192529089 0.1996788782  
C 8.2787520508 -9.3681580566 -1.1340428024  
C 8.3045304268 -10.6993553279 -1.5593800104  
C 8.0464798119 -11.7702134750 -0.6745836049  
C 7.7153645814 -11.4185420568 0.6529250973  
C 7.6630848682 -10.0792683893 1.0754543330  
B 8.1459111470 -13.3035174844 -1.1925289008  
O 6.9866614127 -13.6113005712 -2.1217347000  
O 7.9210762217 -14.3030288444 -0.0343227673  
C 9.0024805559 -15.1479807931 -0.0502794950  
C 9.9159361850 -14.7499615191 -1.0543268251  
C 11.1289093695 -15.4087303824 -1.2209268414  
C 11.3939232739 -16.4972939420 -0.3674190780  
C 10.4715978326 -16.9176139753 0.5970055356  
C 9.2479428804 -16.2366360399 0.7779337898  
C 10.9534331320 -18.1739118524 1.3151937327  
C 12.4661097741 -18.1936181920 0.9373157794  
C 12.6546077556 -17.3534320366 -0.3707873940  
C 12.8028172102 -18.1833963325 -1.6926705724  
C 14.3048522535 -18.1854607622 -2.1041951617  
C 14.8241519882 -16.9482628128 -1.3812092596  
C 13.9429939204 -16.5364617791 -0.3743554712  
C 16.0449686147 -16.2768977469 -1.5993421751  
C 16.3391918846 -15.2095503077 -0.7583076686  
C 15.4817048577 -14.8331919045 0.3005245303  
C 14.2622299442 -15.4746748573 0.4962984189  
O 9.4656836360 -13.6710551214 -1.7449200804  
C 10.2200768102 -19.4172047540 0.7589060005

C 10.7527962656 -18.1150993686 2.8405187951  
C 15.0294068542 -19.4446070786 -1.5721340411  
C 14.4742176732 -18.1161727843 -3.6323189943  
O 15.9974170420 -13.7957785934 1.0213461898  
O 17.4263802568 -14.3780218300 -0.8078938081  
Na 5.7776272583 -6.5305498396 0.1996840770  
Na 5.8552975722 -13.6093517277 -0.1923466603  
Na 19.4705733131 -7.3003173532 -0.4997965299  
Na 19.5467996653 -14.0783645802 -0.5820656886  
H 17.7993993641 -8.6769497013 1.0918364333  
H 18.0180969929 -11.0456977104 1.7975960902  
H 16.6286647344 -9.9674929491 -2.8553220451  
H 16.7313345638 -12.3176989348 -2.1101003373  
H 18.1512521028 -14.3256449183 2.0118414334  
H 16.7262579990 -16.5624837859 -2.4061182104  
H 14.0003932473 -17.2106440484 -4.0423204905  
H 14.0144339114 -18.9945873342 -4.1157329050  
H 15.5399904725 -18.1033338261 -3.9160135175  
H 14.9145808225 -19.5350312527 -0.4809989486  
H 14.6215264910 -20.3568379181 -2.0405370351  
H 16.1087231207 -19.3988469714 -1.7930643876  
H 13.5733897581 -15.1422261314 1.2768075639  
H 12.2203205993 -17.6803709629 -2.4816294565  
H 12.4002073585 -19.2048134191 -1.5942343878  
H 13.0381518156 -17.7068648140 1.7443316055  
H 12.8548210476 -19.2205266999 0.8368335778  
H 9.6811572249 -18.0828117039 3.0986145912  
H 11.2337646840 -17.2215041559 3.2682134722  
H 11.1837432835 -19.0063731924 3.3274098862  
H 9.1389965148 -19.3603138692 0.9677465753  
H 10.3440951451 -19.4954558889 -0.3319685435  
H 10.6101371324 -20.3406209301 1.2209717151  
H 11.8515717756 -15.0680247633 -1.9660292563  
H 8.5255473356 -16.5359238461 1.5427303592

|   |               |                |               |
|---|---------------|----------------|---------------|
| H | 6.9929455413  | -13.0035102957 | -2.8777912627 |
| H | 18.2909043365 | -7.9136878351  | -3.1697870056 |
| H | 13.4448936926 | -5.7939739051  | -2.1307626808 |
| H | 16.8778402532 | -4.3674458321  | 1.2901002382  |
| H | 14.2473155790 | -3.6904233960  | 3.1102427690  |
| H | 15.7915617662 | -2.8253784793  | 2.8883053750  |
| H | 14.2980090985 | -1.9065428841  | 3.1808834410  |
| H | 14.9917136108 | -1.3923800352  | -0.5068423770 |
| H | 14.7873360462 | -0.5559151623  | 1.0600499324  |
| H | 16.2488079890 | -1.5321786348  | 0.7429054418  |
| H | 8.4258806838  | -4.3012052673  | -2.1015619614 |
| H | 11.9421144701 | -5.8005368702  | 1.1999178314  |
| H | 11.0657123364 | -3.7197684487  | -3.9987581395 |
| H | 9.5318949652  | -2.8366186037  | -3.7765309835 |
| H | 11.0312154528 | -1.9373045572  | -4.1005462428 |
| H | 12.8292571199 | -1.6859828366  | -1.6897010357 |
| H | 12.9528523954 | -3.2027797448  | -2.5985459736 |
| H | 12.5332273305 | -1.6754622121  | 0.7510459179  |
| H | 9.1185890864  | -1.4924180852  | -1.6530923216 |
| H | 10.5917424519 | -0.5437646075  | -1.9934990740 |
| H | 10.3876900757 | -1.3530688518  | -0.4136048538 |
| H | 12.3843232703 | -3.1871774229  | 1.6664790756  |
| H | 7.5982580977  | -6.6904794681  | 2.5012218315  |
| H | 8.5913700152  | -10.9184416352 | -2.5948380773 |
| H | 8.5422898944  | -8.5741499964  | -1.8405096257 |
| H | 7.4319146630  | -9.8470686766  | 2.1203650776  |
| H | 7.5886494699  | -12.2186872922 | 1.3957729233  |

\*\*\*\*\*

Me<sub>4</sub>N<sup>+</sup>

|   |               |                |               |
|---|---------------|----------------|---------------|
| N | 12.5345714929 | -10.9287773675 | -0.1714057191 |
| C | 11.8983483885 | -11.7821014217 | 0.8974524152  |

C 13.6090322259 -11.7273840410 -0.8661536078  
C 11.4801510111 -10.5188460430 -1.1688932857  
C 13.1442818688 -9.6982751321 0.4538819153  
H 11.4773659755 -12.6776173312 0.4238437373  
H 12.6640402082 -12.0688254596 1.6289666883  
H 11.1042104090 -11.2066130072 1.3889010074  
H 14.0853172506 -11.1000314873 -1.6298106521  
H 14.3499266067 -12.0424563902 -0.1211937593  
H 13.1471828004 -12.6059816043 -1.3326863724  
H 11.9459837361 -9.9127636348 -1.9553853052  
H 11.0352513021 -11.4219485462 -1.6041977379  
H 10.7107675503 -9.9359570952 -0.6479892023  
H 13.6179853907 -9.1001892592 -0.3341833490  
H 12.3510825983 -9.1184087984 0.9407572761  
H 13.8912390329 -10.0111453067 1.1933886749

\*\*\*\*\*

Et<sub>4</sub>N<sup>+</sup>

N 12.6574860568 -10.5679919608 -0.1354804750  
C 12.4369465530 -11.6749406421 0.9025089732  
C 13.8522212088 -10.9402546142 -1.0185919147  
C 11.3807778756 -10.4240921150 -0.9724392240  
C 12.9552745230 -9.2299566897 0.5492015059  
H 12.1674382181 -12.5705180555 0.3276104431  
H 13.4191345201 -11.8569155947 1.3607285352  
C 11.3904127579 -11.3839973791 1.9694783690  
H 14.0472536025 -10.0558062038 -1.6405258270  
H 14.7019111007 -11.0571337046 -0.3326621271  
C 13.6879801848 -12.1868057961 -1.8747046219  
C 11.4607278398 -9.4646490719 -2.1508299077  
H 11.1276991282 -11.4396899673 -1.3080369925  
H 10.6011990518 -10.1044542359 -0.2688343531

|   |               |                |               |
|---|---------------|----------------|---------------|
| H | 13.1447991187 | -8.5179015807  | -0.2646137206 |
| H | 12.0196151839 | -8.9304164802  | 1.0413326641  |
| C | 14.1121677683 | -9.2328888437  | 1.5387909540  |
| H | 14.1936298197 | -8.2165404321  | 1.9526261948  |
| H | 13.9518667480 | -9.9120608274  | 2.3874467506  |
| H | 15.0802045330 | -9.4633501203  | 1.0736625859  |
| H | 11.3407229481 | -12.2644264277 | 2.6274379672  |
| H | 11.6547206580 | -10.5253526079 | 2.6007094949  |
| H | 10.3807516733 | -11.2353592609 | 1.5631250341  |
| H | 14.6241472928 | -12.3202050721 | -2.4374732398 |
| H | 13.5409690613 | -13.1018791238 | -1.2849376017 |
| H | 12.8800264468 | -12.1039927907 | -2.6148977485 |
| H | 10.4755084287 | -9.4651982575  | -2.6407816637 |
| H | 11.6648315620 | -8.4270479604  | -1.8530690680 |
| H | 12.1944787653 | -9.7734501213  | -2.9075359996 |

\*\*\*\*\*

Pr<sub>4</sub>N<sup>+</sup>

|   |               |                |               |
|---|---------------|----------------|---------------|
| N | 12.6305407413 | -10.6666114276 | -0.4083831532 |
| C | 12.0614643747 | -11.7581455381 | 0.5029695340  |
| C | 13.7524035223 | -11.2729162385 | -1.2593024168 |
| C | 11.5046663312 | -10.1294440523 | -1.2976839709 |
| C | 13.2042281950 | -9.5105440484  | 0.4183465806  |
| H | 11.6269441690 | -12.5110532253 | -0.1695552432 |
| H | 12.9266272440 | -12.2186034391 | 1.0018276263  |
| C | 11.0216757573 | -11.3190043452 | 1.5318178100  |
| H | 14.2331172426 | -10.4274703030 | -1.7731714987 |
| H | 14.4789096855 | -11.6842168865 | -0.5449498797 |
| C | 13.3406115974 | -12.3474558324 | -2.2636415477 |
| C | 11.9035021017 | -9.1018393030  | -2.3545696115 |
| H | 11.0453551728 | -11.0107315608 | -1.7677895839 |
| H | 10.7640391217 | -9.6947999289  | -0.6116082395 |



|   |               |                |               |
|---|---------------|----------------|---------------|
| H | 13.6368272676 | -8.8103457244  | -0.3093100148 |
| H | 12.3394554238 | -9.0157103508  | 0.8836618235  |
| C | 14.2459954802 | -9.8785248101  | 1.4728345748  |
| C | 14.7401255921 | -8.6061760985  | 2.1785262960  |
| H | 13.8189245613 | -10.5679444208 | 2.2184022579  |
| H | 15.1060159143 | -10.3876617811 | 1.0108889722  |
| C | 10.5332326391 | -12.5381370594 | 2.3289896277  |
| H | 11.4451311186 | -10.5776651169 | 2.2282477355  |
| H | 10.1584744244 | -10.8451554148 | 1.0385882449  |
| C | 14.5765964130 | -12.8477840147 | -3.0266319935 |
| H | 12.8669158423 | -13.2006918242 | -1.7523615941 |
| H | 12.6061170422 | -11.9504602607 | -2.9822750184 |
| C | 10.6641878838 | -8.6663845038  | -3.1514396052 |
| H | 12.3558810155 | -8.2149480119  | -1.8842100241 |
| H | 12.6511832774 | -9.5193936866  | -3.0482258161 |
| H | 9.7993405742  | -12.2268977419 | 3.0849285232  |
| H | 10.0459284339 | -13.2788891789 | 1.6763909090  |
| H | 11.3621892862 | -13.0377038349 | 2.8537003286  |
| H | 15.4825145663 | -8.8611406362  | 2.9469178860  |
| H | 15.2187784947 | -7.9130798182  | 1.4696255625  |
| H | 13.9164675295 | -8.0701627324  | 2.6750292743  |
| H | 14.2881022358 | -13.6252947754 | -3.7468910485 |
| H | 15.0618517285 | -12.0347577722 | -3.5884542967 |
| H | 15.3226687415 | -13.2842827455 | -2.3449800353 |
| H | 10.9471504297 | -7.9379220243  | -3.9234625708 |
| H | 10.1859733276 | -9.5189559765  | -3.6578521014 |
| H | 9.9126677581  | -8.1895723531  | -2.5033240551 |

\*\*\*\*\*

Na<sub>4</sub>3 - Me<sub>4</sub>N<sup>+</sup>

|   |               |                |               |
|---|---------------|----------------|---------------|
| C | 17.1757255418 | -11.4859563977 | -1.5116039250 |
| C | 17.3443834709 | -11.8498092404 | -0.1568766885 |

C 17.4961159752 -10.7966896469 0.7678246638  
C 17.4269811622 -9.4540701642 0.3662602425  
C 17.2468850479 -9.0851880446 -0.9862522581  
C 17.1457624172 -10.1448747174 -1.9150047185  
B 17.2340649282 -13.3756706322 0.3529700186  
O 18.3687667528 -13.6631921179 1.2844482705  
B 17.1577311908 -7.5340043585 -1.4613877330  
O 15.8165423370 -7.1580388177 -1.9718526078  
C 15.3960333636 -6.0753488360 -1.2568821558  
C 16.3292700392 -5.7134885913 -0.2596220690  
C 16.1156310728 -4.6381049223 0.5940557382  
C 14.8989463355 -3.9372797439 0.4506340048  
C 13.9537399602 -4.3243883787 -0.5056357253  
C 14.1912040179 -5.3944820342 -1.3908642554  
C 12.6858950706 -3.4833990032 -0.4327563505  
C 12.9211271381 -2.6617141264 0.8809058352  
C 14.4449125260 -2.6956324823 1.2112197829  
C 12.4298524950 -2.6375555997 -1.7247293914  
C 10.8986366524 -2.6574569530 -2.0256880409  
C 10.4537910949 -3.9143348332 -1.2830651424  
C 11.4252783668 -4.3343765710 -0.3681421784  
C 9.2253636039 -4.5982222626 -1.4016923096  
C 9.0239900202 -5.6929107308 -0.5662210971  
C 9.9929946336 -6.0915794074 0.3802006648  
C 11.2091959012 -5.4287280046 0.4902422144  
O 7.9357070195 -6.5353123551 -0.5215944667  
B 8.2041510427 -7.5216254364 0.6642886881  
O 7.2003494909 -7.2007496276 1.7362714209  
O 9.5826729790 -7.1773335917 1.1025152661  
C 10.6233416366 -2.7180638481 -3.5383921326  
C 10.1933645365 -1.4170287208 -1.4292149329  
C 14.6921066372 -2.7867788801 2.7273645399  
C 15.1651716695 -1.4450635759 0.6553445189  
O 17.3932232944 -6.5822935645 -0.2698353118

O 18.3056211103 -7.1958247858 -2.3769740209  
C 8.0264086722 -9.0447975903 0.1694660597  
C 7.9457263575 -9.3986424069 -1.1949007704  
C 7.9266038062 -10.7378615682 -1.6069100130  
C 8.0291497216 -11.8008988497 -0.6835430897  
C 8.0769485517 -11.4441591361 0.6823059395  
C 8.0570750667 -10.1049647809 1.0986773365  
B 8.1376718671 -13.3435465429 -1.1675844800  
O 6.9854940943 -13.7243016621 -2.0471282859  
O 7.9659362018 -14.3066061577 0.0226796520  
C 9.0363198397 -15.1635846708 -0.0164524716  
C 9.9353729448 -14.7757726617 -1.0360533822  
C 11.1351464607 -15.4548244086 -1.2263512296  
C 11.4009531864 -16.5489688311 -0.3777264838  
C 10.4891881976 -16.9565783954 0.6020269257  
C 9.2810870859 -16.2574135820 0.8055739915  
C 10.9652725940 -18.2222339548 1.3080949089  
C 12.4766025634 -18.2416070122 0.9275150155  
C 12.6573333306 -17.4108609144 -0.3871486585  
C 12.8122143613 -18.2458142080 -1.7041576240  
C 14.3162073338 -18.2376873398 -2.1128874036  
C 14.8208361293 -16.9877501142 -1.4013355073  
C 13.9335984305 -16.5798566554 -0.3989504593  
C 16.0279609935 -16.2954756386 -1.6288578123  
C 16.2979732222 -15.2061375377 -0.8076363347  
C 15.4307808023 -14.8292851735 0.2409696408  
C 14.2307199564 -15.4992748013 0.4553397097  
O 9.4872590593 -13.6776462926 -1.7127301555  
C 10.2239657903 -19.4524940756 0.7338506895  
C 10.7657152667 -18.1811296681 2.8333162953  
C 15.0540849729 -19.4826709243 -1.5672009500  
C 14.4867700003 -18.1793722656 -3.6409866566  
O 15.9082483660 -13.7456135831 0.9288922311  
O 17.3660850730 -14.3502086470 -0.8728445986

|    |               |                |               |
|----|---------------|----------------|---------------|
| Na | 5.8358229054  | -6.4226356180  | 0.1397673318  |
| Na | 5.8485736761  | -13.7287015160 | -0.0837519056 |
| Na | 19.4751145146 | -7.2177167735  | -0.4482224212 |
| Na | 19.5077225899 | -14.0875983606 | -0.6387098534 |
| H  | 17.4684311763 | -8.6601019554  | 1.1228963397  |
| H  | 17.6404607575 | -11.0395690400 | 1.8259835817  |
| H  | 17.0049375351 | -9.9199609866  | -2.9793376340 |
| H  | 17.0402905105 | -12.2763806397 | -2.2580506084 |
| H  | 18.0881960735 | -14.3297113744 | 1.9340608850  |
| H  | 16.7160723305 | -16.5819237814 | -2.4286409555 |
| H  | 14.0144799331 | -17.2769156545 | -4.0601182506 |
| H  | 14.0255341026 | -19.0600736547 | -4.1170242897 |
| H  | 15.5519419566 | -18.1730932042 | -3.9250959335 |
| H  | 14.9424013271 | -19.5673686968 | -0.4753706718 |
| H  | 14.6557220598 | -20.4016775661 | -2.0282195404 |
| H  | 16.1320617817 | -19.4293760081 | -1.7907321207 |
| H  | 13.5442208758 | -15.1878815122 | 1.2475180471  |
| H  | 12.2283876307 | -17.7524153534 | -2.4982129249 |
| H  | 12.4184155317 | -19.2691924865 | -1.6007005478 |
| H  | 13.0486115174 | -17.7480640320 | 1.7307058794  |
| H  | 12.8688301456 | -19.2666396070 | 0.8338483714  |
| H  | 9.6952311804  | -18.1570551030 | 3.0948545749  |
| H  | 11.2464757613 | -17.2937216886 | 3.2744325315  |
| H  | 11.1994045492 | -19.0771202516 | 3.3070145088  |
| H  | 9.1438239901  | -19.3924742934 | 0.9438440777  |
| H  | 10.3466994975 | -19.5212280993 | -0.3576112973 |
| H  | 10.6072136702 | -20.3829390888 | 1.1848862813  |
| H  | 11.8380758513 | -15.1501679539 | -2.0069200913 |
| H  | 8.5665017433  | -16.5503435178 | 1.5793042042  |
| H  | 6.9494652985  | -13.1930707830 | -2.8575087855 |
| H  | 18.2724299054 | -7.6973185772  | -3.2061487347 |
| H  | 13.4574085955 | -5.6973763523  | -2.1429541935 |
| H  | 16.8547592903 | -4.3639179072  | 1.3515672138  |
| H  | 14.2242418905 | -3.6886520770  | 3.1525045835  |

H 15.7703047347 -2.8192603035 2.9553772228  
H 14.2743359223 -1.9072317490 3.2442359330  
H 15.0011079729 -1.3387584175 -0.4277691543  
H 14.7982849950 -0.5315774555 1.1530298238  
H 16.2524900397 -1.5104675345 0.8235221161  
H 8.4682811386 -4.2981893839 -2.1318316215  
H 11.9657177625 -5.7553826597 1.2088757001  
H 11.0824066049 -3.6122014736 -3.9881514550  
H 9.5411367391 -2.7449032007 -3.7485084671  
H 11.0344772158 -1.8296434053 -4.0454744091  
H 12.8213628974 -1.6114957887 -1.6362844194  
H 12.9615241476 -3.1151811086 -2.5636637053  
H 12.5374819508 -1.6316570747 0.8015054725  
H 9.1034368343 -1.4708278542 -1.5862967107  
H 10.5603414334 -0.4938287102 -1.9082995242  
H 10.3718051733 -1.3388920701 -0.3458744134  
H 12.3690452537 -3.1496086263 1.7010906184  
H 7.6413285474 -6.6955411689 2.4391066642  
H 7.8725209126 -10.9546422364 -2.6810680057  
H 7.9235536160 -8.6009863571 -1.9448217241  
H 8.0877541360 -9.8730020975 2.1685927750  
H 8.1598702096 -12.2451037265 1.4267411882  
N 12.5350318295 -10.9277645762 -0.1713831029  
C 11.8996679720 -11.7817807901 0.8946577278  
C 13.6091128162 -11.7268463800 -0.8624902773  
C 11.4781011239 -10.5202333191 -1.1666008538  
C 13.1424635059 -9.6969060650 0.4519807596  
H 11.4794716987 -12.6783104722 0.4202557969  
H 12.6716096120 -12.0681462250 1.6201186412  
H 11.1016132550 -11.2039944695 1.3784135630  
H 14.0865036398 -11.0941705413 -1.6209527027  
H 14.3546610263 -12.0469657879 -0.1221607650  
H 13.1398563399 -12.6036794237 -1.3256890950  
H 11.9520687372 -9.9113787224 -1.9469938981

H 11.0303264556 -11.4271634412 -1.5935887873  
H 10.7069087133 -9.9381628088 -0.6455366689  
H 13.6232114875 -9.0986109144 -0.3327096805  
H 12.3431153020 -9.1179346702 0.9321878355  
H 13.8930143653 -10.0152732834 1.1857842290

\*\*\*\*\*

Na<sub>4</sub>3 - Et<sub>4</sub>N<sup>+</sup>

C 17.3090642327 -11.6519783190 -1.5863925437  
C 17.4876577133 -12.0178445170 -0.2336232205  
C 17.6568892771 -10.9597743558 0.6827877008  
C 17.5735128926 -9.6171752679 0.2832267128  
C 17.3524648817 -9.2496696619 -1.0633081946  
C 17.2576154217 -10.3114805227 -1.9900403598  
B 17.3453272200 -13.5505316722 0.2760140055  
O 18.4872148843 -13.9531820602 1.1775535355  
B 17.1994685983 -7.6999105516 -1.5282095440  
O 15.8346964290 -7.3607960566 -2.0112073964  
C 15.3953205638 -6.2943396306 -1.2834232229  
C 16.3340572876 -5.9149757171 -0.2971068748  
C 16.1053230284 -4.8494028132 0.5649246901  
C 14.8746700231 -4.1709423470 0.4370394316  
C 13.9272865216 -4.5652056166 -0.5150553087  
C 14.1766653090 -5.6319022637 -1.4041165804  
C 12.6639528981 -3.7126917454 -0.4515002236  
C 12.8918414379 -2.9094216788 0.8750048299  
C 14.4138717808 -2.9394255865 1.2096314225  
C 12.4471055957 -2.8387285772 -1.7321522092  
C 10.9179049371 -2.7992321858 -2.0435264228  
C 10.4221153145 -4.0482969013 -1.3208673539  
C 11.3766878313 -4.5272220951 -0.4162493254  
C 9.1588213098 -4.6703274467 -1.4381343811

C 8.9142980830 -5.7688244047 -0.6179493936  
C 9.8692254815 -6.2394713017 0.3124760186  
C 11.1137174829 -5.6250731741 0.4259333768  
O 7.7637104057 -6.5310758147 -0.5519911167  
B 7.9888940984 -7.5860592221 0.5660129729  
O 7.0360590554 -7.2211756148 1.6692616505  
O 9.4104079596 -7.3126293727 1.0002343962  
C 10.6505649711 -2.8288414252 -3.5587375331  
C 10.2524705356 -1.5416030535 -1.4365342004  
C 14.6547651148 -3.0505057125 2.7258715590  
C 15.1341974168 -1.6803413204 0.6733859840  
O 17.4232507288 -6.7487702500 -0.3329648851  
O 18.3169719197 -7.3222553777 -2.4609349482  
C 7.8253250933 -9.1045516973 0.0626346599  
C 7.8062419616 -9.4479762895 -1.3063769496  
C 7.8318049688 -10.7825431415 -1.7283215482  
C 7.8855748965 -11.8578245001 -0.8125683377  
C 7.8504505602 -11.5129470991 0.5554738368  
C 7.8191713218 -10.1749708207 0.9797295971  
B 8.0069184882 -13.4021891593 -1.3032768885  
O 6.8582755988 -13.7743927214 -2.1934036360  
O 7.8215308442 -14.3643425175 -0.1127933256  
C 8.9186109279 -15.1873526291 -0.1069031257  
C 9.8252835402 -14.8017063326 -1.1205904851  
C 11.0459509419 -15.4541458013 -1.2737023088  
C 11.3300777034 -16.5155954289 -0.3885982930  
C 10.4121521660 -16.9171391007 0.5888840760  
C 9.1799887347 -16.2491041822 0.7498504691  
C 10.9004064366 -18.1489672964 1.3431640749  
C 12.4112061958 -18.1712613580 0.9623849567  
C 12.5904859044 -17.3751136497 -0.3743823828  
C 12.7233265898 -18.2547324744 -1.6644557224  
C 14.2276903390 -18.3105834701 -2.0640135366  
C 14.7696420870 -17.0543986908 -1.3919999042

C 13.8901837463 -16.5763774645 -0.4126118282  
C 16.0131436520 -16.4294822443 -1.6175621280  
C 16.3250432995 -15.3391890603 -0.8164717391  
C 15.4703720739 -14.8861741177 0.2121747261  
C 14.2331062902 -15.4914618130 0.4213622159  
O 9.3554876177 -13.7407244643 -1.8373394529  
C 10.1673350487 -19.4095007788 0.8270702097  
C 10.7044443669 -18.0432238671 2.8661843629  
C 14.9235444869 -19.5585704552 -1.4710125987  
C 14.4090198699 -18.3121104125 -3.5919460311  
O 15.9997109862 -13.8095781737 0.8699303290  
O 17.4400771666 -14.5375041714 -0.8964579695  
Na 6.3619868871 -5.3639836147 0.7361054902  
Na 5.7140419637 -13.7628336984 -0.2411067222  
Na 19.5115916248 -7.3817149642 -0.5362920727  
Na 19.6088115922 -14.3391581598 -0.6955154730  
H 17.6149474180 -8.8243202413 1.0416940548  
H 17.8020894694 -11.1832237676 1.7466251393  
H 17.0905706544 -10.0879206425 -3.0509476317  
H 17.1663748242 -12.4436354986 -2.3308430089  
H 18.4194920750 -13.5776121331 2.0669268584  
H 16.7022076223 -16.7713358887 -2.3949677229  
H 13.9568019784 -17.4174388220 -4.0476992631  
H 13.9346310324 -19.2010755361 -4.0390810634  
H 15.4764123143 -18.3365182609 -3.8668092339  
H 14.8044909157 -19.6009621700 -0.3778380038  
H 14.4996545429 -20.4805587932 -1.9025606817  
H 16.0040190410 -19.5451340253 -1.6885119307  
H 13.5554554452 -15.1382433126 1.2035184330  
H 12.1584630200 -17.7670414778 -2.4755838710  
H 12.2939023394 -19.2596667461 -1.5287058496  
H 12.9828532515 -17.6568751139 1.7525286028  
H 12.8066918721 -19.1972710544 0.8944166624  
H 9.6344912100 -18.0127884283 3.1296536752



H 11.1814984993 -17.1341508597 3.2653472603  
H 11.1445037239 -18.9148495202 3.3780548658  
H 9.0878534791 -19.3506304275 1.0413401369  
H 10.2844645103 -19.5236945230 -0.2611337507  
H 10.5622437664 -20.3163673076 1.3149983719  
H 11.7487451081 -15.1535966662 -2.0554638161  
H 8.4585125280 -16.5441293058 1.5165822623  
H 6.8263510290 -13.2378550661 -3.0003986683  
H 18.2953997651 -7.8305340270 -3.2863271167  
H 13.4473828042 -5.9348575709 -2.1604656787  
H 16.8491668361 -4.5596253472 1.3121325023  
H 14.1849541445 -3.9580438284 3.1369177039  
H 15.7318439584 -3.0872272568 2.9575338161  
H 14.2354671319 -2.1779613607 3.2535081134  
H 14.9817975292 -1.5641756891 -0.4103231912  
H 14.7585258658 -0.7730686295 1.1756635465  
H 16.2198275856 -1.7428266966 0.8526402568  
H 8.4130461058 -4.3323466686 -2.1642758584  
H 11.8560367488 -5.9858969064 1.1429027997  
H 11.0807266477 -3.7314684576 -4.0195643519  
H 9.5695190813 -2.8150436658 -3.7747266982  
H 11.0950649724 -1.9479530889 -4.0502863934  
H 12.8713858136 -1.8280807804 -1.6239040205  
H 12.9695246598 -3.3200183777 -2.5747828026  
H 12.5020802643 -1.8807984002 0.8104137846  
H 9.1641589297 -1.5495394398 -1.6140647751  
H 10.6624789730 -0.6254199660 -1.8929167871  
H 10.4156879137 -1.4888393824 -0.3492715511  
H 12.3409483334 -3.4134835927 1.6862126128  
H 6.6708113127 -8.0073792286 2.0987923760  
H 7.8396082994 -10.9903175407 -2.8057910300  
H 7.7925367885 -8.6444635285 -2.0502090976  
H 7.8443395395 -9.9680821807 2.0577887242  
H 7.9005319716 -12.3176452894 1.2987427955

|   |               |                |               |
|---|---------------|----------------|---------------|
| N | 12.6541928058 | -10.5695764524 | -0.1355582219 |
| C | 12.4511041204 | -11.6888556956 | 0.8891717661  |
| C | 13.8535076009 | -10.9328608495 | -1.0114872909 |
| C | 11.3802703504 | -10.4254700078 | -0.9740799926 |
| C | 12.9287507179 | -9.2310925170  | 0.5507602589  |
| H | 12.1525789527 | -12.5739650993 | 0.3111351949  |
| H | 13.4458156813 | -11.8922752298 | 1.3129161638  |
| C | 11.4302026089 | -11.4007609632 | 1.9800790721  |
| H | 14.0821431180 | -10.0357531575 | -1.6032551438 |
| H | 14.6934991752 | -11.0936736366 | -0.3220804547 |
| C | 13.6626324153 | -12.1603197439 | -1.8894309210 |
| C | 11.4929813199 | -9.4689408561  | -2.1524296376 |
| H | 11.1105274387 | -11.4378458795 | -1.3053886994 |
| H | 10.5990454191 | -10.0847032824 | -0.2822159803 |
| H | 13.1433808358 | -8.5183016650  | -0.2568082675 |
| H | 11.9795564904 | -8.9297989379  | 1.0161857586  |
| C | 14.0692383539 | -9.2292820516  | 1.5571635602  |
| H | 14.1670029197 | -8.2010846561  | 1.9374400430  |
| H | 13.8856001672 | -9.8874805317  | 2.4182672390  |
| H | 15.0336373603 | -9.4928353680  | 1.1030943858  |
| H | 11.3846663144 | -12.2903018565 | 2.6265454826  |
| H | 11.7126332962 | -10.5473185877 | 2.6114201279  |
| H | 10.4191659931 | -11.2343580587 | 1.5849231654  |
| H | 14.5941160766 | -12.2952883161 | -2.4579876488 |
| H | 13.5133722944 | -13.0828532494 | -1.3111904870 |
| H | 12.8435747805 | -12.0568552737 | -2.6155572223 |
| H | 10.5207779737 | -9.4767316519  | -2.6656824686 |
| H | 11.6855666960 | -8.4314621751  | -1.8457938383 |
| H | 12.2553608142 | -9.7772304633  | -2.8809106304 |

\*\*\*\*\*

Na<sub>4</sub>3 - Pr<sub>4</sub>N<sup>+</sup>

C 17.4945517549 -11.5729575160 -1.4527482406  
C 17.5647921731 -11.9102118257 -0.0840283655  
C 17.7022960819 -10.8361135067 0.8163538486  
C 17.6736863943 -9.5000001300 0.3851048452  
C 17.5167236336 -9.1607558723 -0.9756510155  
C 17.4746548454 -10.2427082087 -1.8840920364  
B 17.3230258969 -13.4150670034 0.4386570519  
O 18.2695978029 -13.8151040135 1.5389561078  
B 17.3515960728 -7.6242962210 -1.4775441758  
O 15.9816006463 -7.3242605975 -1.9818636620  
C 15.4900685882 -6.2894953421 -1.2451819442  
C 16.4093598532 -5.8743555518 -0.2530521901  
C 16.1258275463 -4.8364869309 0.6254309724  
C 14.8634122806 -4.2190185400 0.5048346720  
C 13.9379057650 -4.6442916378 -0.4556069771  
C 14.2397508887 -5.6860787684 -1.3576201420  
C 12.6464135132 -3.8360762191 -0.4000135183  
C 12.8309069586 -3.0415581447 0.9394514504  
C 14.3499097052 -3.0149572638 1.2856368626  
C 12.4265395994 -2.9508888523 -1.6719448873  
C 10.8965882956 -2.9032664069 -1.9738765524  
C 10.4062024174 -4.1648043164 -1.2701012734  
C 11.3719625655 -4.6737192637 -0.3925356894  
C 9.1350441786 -4.7701621713 -1.3775588695  
C 8.8940601841 -5.8841171769 -0.5780539338  
C 9.8638567573 -6.3990603856 0.3129769563  
C 11.1184933535 -5.7997115694 0.4165205904  
O 7.7309643024 -6.6260777082 -0.5058306888  
B 7.9497076992 -7.6925599726 0.5975380167  
O 7.0538651456 -7.2897723046 1.7334377681  
O 9.4041083191 -7.4911258706 0.9731227497  
C 10.6243916554 -2.9118746776 -3.4890285733  
C 10.2318265548 -1.6542751091 -1.3486700812  
C 14.5877633043 -3.1307596908 2.8019635209

C 15.0258159895 -1.7244875331 0.7653907252  
O 17.5405413807 -6.6453299047 -0.3013495591  
O 18.4664727742 -7.2400151775 -2.4025296605  
C 7.7064285065 -9.1992663233 0.0869127604  
C 7.7533959375 -9.5311065172 -1.2842827961  
C 7.7669136424 -10.8598208069 -1.7193539307  
C 7.7422942520 -11.9444026462 -0.8133441267  
C 7.6095104802 -11.6099676082 0.5511031788  
C 7.5886581773 -10.2753411146 0.9871006376  
B 7.9009983445 -13.4787296297 -1.3194669870  
O 6.7738177631 -13.8639665688 -2.2286002004  
O 7.7288205987 -14.4565618937 -0.1411924759  
C 8.8579917863 -15.2310531604 -0.1109974462  
C 9.7572265486 -14.8269255190 -1.1253438133  
C 10.9931014723 -15.4520668088 -1.2738618863  
C 11.3134350019 -16.4851622044 -0.3681317881  
C 10.4111009046 -16.8924353164 0.6214546314  
C 9.1558016806 -16.2655264547 0.7672276689  
C 10.9392778000 -18.0894880529 1.4035329781  
C 12.4492177179 -18.0731969209 1.0192128298  
C 12.6039963208 -17.2963024104 -0.3344183241  
C 12.7887493045 -18.1959356539 -1.6023453874  
C 14.3096670075 -18.2517232749 -1.9434693540  
C 14.8213191225 -16.9843123698 -1.2666798421  
C 13.8814189658 -16.4616765198 -0.3693901303  
C 16.0862245226 -16.3793180016 -1.4229978307  
C 16.3477842316 -15.2506639692 -0.6539330567  
C 15.4060222809 -14.7169201799 0.2538769699  
C 14.1588426199 -15.3211378079 0.4121576335  
O 9.2634235093 -13.7816857103 -1.8472968994  
C 10.2458688177 -19.3835387690 0.9160798576  
C 10.7404769455 -17.9538574065 2.9239625171  
C 14.9865887941 -19.4969475691 -1.3244108272  
C 14.5458513707 -18.2570872289 -3.4652292144

O 15.8804279867 -13.5972599056 0.8628236676  
O 17.5044051635 -14.4959657695 -0.6498867471  
Na 6.3548546655 -5.4513333327 0.7790996601  
Na 5.6174692074 -13.8432880008 -0.2791389061  
Na 19.6404089374 -7.2752312228 -0.4586011136  
Na 19.1926135350 -15.4520024824 0.4475238909  
H 17.6934194067 -8.6957913638 1.1311417361  
H 17.7647946271 -11.0277545868 1.8961745672  
H 17.3810210479 -10.0423833312 -2.9587155840  
H 17.4253354997 -12.3789808988 -2.1892881715  
H 18.4777786972 -13.0694194283 2.1198206512  
H 16.8234272368 -16.7557111693 -2.1388785452  
H 14.1084527499 -17.3640896139 -3.9382577573  
H 14.0890354080 -19.1475168360 -3.9275700691  
H 15.6223236093 -18.2784739513 -3.7025091782  
H 14.8417991551 -19.5308799495 -0.2340562861  
H 14.5714788185 -20.4216242693 -1.7587410188  
H 16.0719286569 -19.4892728891 -1.5191960996  
H 13.4236122496 -14.9255779337 1.1180686398  
H 12.2555048071 -17.7205219188 -2.4418063022  
H 12.3556785081 -19.1998293998 -1.4719884953  
H 13.0084184612 -17.5297499093 1.7987562339  
H 12.8721464168 -19.0891018183 0.9687189682  
H 9.6699840702 -17.9553271836 3.1867961796  
H 11.1838558744 -17.0183058260 3.3000559306  
H 11.2106981977 -18.7965513668 3.4571047553  
H 9.1658123213 -19.3543587620 1.1327714060  
H 10.3629477765 -19.5134866531 -0.1704338585  
H 10.6708185425 -20.2682856687 1.4194510496  
H 11.6803507015 -15.1526169189 -2.0690674448  
H 8.4446397696 -16.5691587403 1.5401472068  
H 6.7383168023 -13.3074070644 -3.0220988290  
H 18.4831161076 -7.7877243877 -3.2026773040  
H 13.5269592167 -6.0073805673 -2.1223541877

|   |               |                |               |
|---|---------------|----------------|---------------|
| H | 16.8527886654 | -4.5232713057  | 1.3794189503  |
| H | 14.1541729872 | -4.0609849319  | 3.2017323049  |
| H | 15.6649227774 | -3.1258421255  | 3.0362252164  |
| H | 14.1318565917 | -2.2804764440  | 3.3355607633  |
| H | 14.8846637325 | -1.6094766887  | -0.3199180695 |
| H | 14.6077929489 | -0.8350389744  | 1.2662863858  |
| H | 16.1104925115 | -1.7459106406  | 0.9587608333  |
| H | 8.3766608464  | -4.4045125963  | -2.0767421085 |
| H | 11.8746645731 | -6.1865956454  | 1.1050462144  |
| H | 11.0541257550 | -3.8078489147  | -3.9632966174 |
| H | 9.5428315840  | -2.8955347780  | -3.7028181466 |
| H | 11.0682662639 | -2.0241303918  | -3.9689599081 |
| H | 12.8587978290 | -1.9437035677  | -1.5643270090 |
| H | 12.9394422504 | -3.4332855888  | -2.5201859119 |
| H | 12.4030802947 | -2.0277380216  | 0.8858259890  |
| H | 9.1437291578  | -1.6591111588  | -1.5283879012 |
| H | 10.6430048769 | -0.7316543569  | -1.7910066886 |
| H | 10.3922295838 | -1.6177412767  | -0.2604395080 |
| H | 12.2929176757 | -3.5769746377  | 1.7393792284  |
| H | 6.7403723357  | -8.0585402438  | 2.2298686621  |
| H | 7.8369356552  | -11.0579721916 | -2.7963655520 |
| H | 7.8055364494  | -8.7215900803  | -2.0185242084 |
| H | 7.5472239808  | -10.0858431455 | 2.0683450913  |
| H | 7.6004253034  | -12.4164445422 | 1.2945603796  |
| N | 12.6349450611 | -10.6805732277 | -0.4137608324 |
| C | 12.0749746765 | -11.7513199347 | 0.5217124028  |
| C | 13.7521587591 | -11.3204943434 | -1.2457523139 |
| C | 11.5157932876 | -10.1499590885 | -1.3142560415 |
| C | 13.1965515227 | -9.4984267899  | 0.3820966351  |
| H | 11.5897585119 | -12.4976043660 | -0.1250980033 |
| H | 12.9513144404 | -12.2266861369 | 0.9869307401  |
| C | 11.0829563193 | -11.2796622877 | 1.5799493954  |
| H | 14.2366923212 | -10.4963930271 | -1.7886361978 |
| H | 14.4829640948 | -11.7206474331 | -0.5272159990 |

C 13.2875232957 -12.4204641065 -2.2007305386  
C 11.9877930443 -9.2482400856 -2.4579491691  
H 10.9731040455 -11.0284131566 -1.6926100809  
H 10.8315506837 -9.5978503726 -0.6554378686  
H 13.6609097452 -8.8251757680 -0.3528383612  
H 12.3191184199 -8.9827637178 0.7998966880  
C 14.2029583601 -9.8377123068 1.4757811166  
C 14.6158457448 -8.5461090043 2.1966306623  
H 13.7744645532 -10.5445034626 2.2037312505  
H 15.0950584756 -10.3140631993 1.0454034985  
C 10.6325370463 -12.4801905157 2.4247843332  
H 11.5298880274 -10.5220108600 2.2434995664  
H 10.2044714557 -10.8144540452 1.1095092291  
C 14.4260032345 -12.8923706350 -3.1122764450  
H 12.9107506759 -13.2824833134 -1.6301725140  
H 12.4564969761 -12.0666871610 -2.8307782859  
C 10.7958717105 -8.5983327282 -3.1717998557  
H 12.6511732005 -8.4552055105 -2.0791056281  
H 12.5740998579 -9.8292527835 -3.1879670511  
H 9.9171697081 -12.1567126763 3.1952054448  
H 10.1434951268 -13.2511730994 1.8085037898  
H 11.4850022667 -12.9518446520 2.9399715908  
H 15.3569925583 -8.7622533761 2.9802695663  
H 15.0616367898 -7.8205888710 1.4986533044  
H 13.7533508632 -8.0596755702 2.6800925086  
H 14.0557080831 -13.6637037492 -3.8032462029  
H 14.8298742341 -12.0648982164 -3.7173371844  
H 15.2499050568 -13.3353016744 -2.5352261593  
H 11.1424820469 -8.0390466043 -4.0532248860  
H 10.0709501646 -9.3530111757 -3.5135737911  
H 10.2684910066 -7.8922222091 -2.5120090682

\*\*\*\*\*

Na<sub>4</sub>3 – Berberine

C 17.4079827632 -11.4597360106 -0.9311629228  
C 17.3626027853 -11.9355693733 0.3849716857  
C 17.4200763392 -10.9690430119 1.3993395925  
C 17.4855222190 -9.6110152010 1.1189165958  
C 17.5152742856 -9.1354250392 -0.1967753236  
C 17.4882410383 -10.0959163115 -1.2128879871  
B 17.2041819239 -13.4927257677 0.7592929678  
O 18.3451681904 -13.9626792191 1.6045661542  
B 17.4677904484 -7.5710895775 -0.5188213417  
O 16.1564284792 -7.1667782352 -1.1230427405  
C 15.6257527766 -6.1900920391 -0.3919902433  
C 16.4408814742 -5.8763796511 0.7154201904  
C 16.1329284755 -4.8502690620 1.5897668849  
C 14.9347644599 -4.1510148895 1.3613506027  
C 14.1071439072 -4.4941770796 0.3038316962  
C 14.4380037176 -5.5137955918 -0.5994062072  
C 12.8524090839 -3.6463510341 0.2598358189  
C 12.9522655179 -2.8501516434 1.5916709624  
C 14.4048954529 -2.9532280213 2.1235303258  
C 12.7475518738 -2.7959124631 -1.0362504986  
C 11.2767505832 -2.8237428149 -1.5211129165  
C 10.7512755806 -4.0725487590 -0.8414987943  
C 11.5906318003 -4.4806408001 0.1813234205  
C 9.5567563246 -4.7627909998 -1.1028943926  
C 9.2540535720 -5.8338671189 -0.2842320166  
C 10.0713823123 -6.2069506803 0.7979089297  
C 11.2621942111 -5.5468090922 1.0261446082  
O 8.1620000384 -6.6411584672 -0.3475982281  
B 8.2301239847 -7.5945858875 0.8467749529  
O 7.0975822305 -7.1534185376 1.7262307613  
O 9.5389659627 -7.2298391202 1.4842426100  
C 11.1940991766 -2.8816443960 -3.0450769778



C 10.5027101880 -1.5984791165 -1.0142289908  
C 14.4261107071 -3.1494668677 3.6392644642  
C 15.2154303103 -1.7007069997 1.7645419762  
O 17.5402924681 -6.6713182995 0.7269489297  
O 18.5892784072 -7.0873224131 -1.3624403456  
C 8.1379795944 -9.1431617054 0.4649312316  
C 7.5265035681 -9.6006137740 -0.7070207233  
C 7.4926845710 -10.9548209434 -1.0308791953  
C 8.0722107483 -11.9229076285 -0.2011099887  
C 8.6578965774 -11.4657525833 0.9862456321  
C 8.6970135223 -10.1139722364 1.3061620732  
B 8.1958477860 -13.4649119681 -0.6447711786  
O 7.0552477609 -13.8088629732 -1.5242630088  
O 8.0745931994 -14.3662469770 0.6350454401  
C 9.1232777401 -15.2247094075 0.5957839699  
C 9.9630960220 -14.9117836806 -0.4859373008  
C 11.1353408695 -15.6038930427 -0.7007524204  
C 11.4393736090 -16.6454165212 0.1843024914  
C 10.5928403391 -16.9841327262 1.2276796063  
C 9.4086395275 -16.2657364080 1.4562300384  
C 11.1013249950 -18.1978148890 1.9811014396  
C 12.5658738188 -18.2959761456 1.4829306866  
C 12.6893419973 -17.4991971361 0.1534648473  
C 12.8159159068 -18.3444491500 -1.1441608119  
C 14.2971580026 -18.3193261435 -1.5949382546  
C 14.8015946751 -17.0572967961 -0.9223355927  
C 13.9465079503 -16.6587341956 0.0925340268  
C 15.9851838656 -16.3500174967 -1.1864267550  
C 16.2636748860 -15.2677189121 -0.3778002182  
C 15.4268682513 -14.9079587950 0.6905746321  
C 14.2474619188 -15.5801837613 0.9304760021  
O 9.4812589294 -13.8822317593 -1.2106843306  
C 10.2953714290 -19.4394147672 1.5768492786  
C 11.0421869628 -18.0282059728 3.4989615710

C 15.0622745775 -19.5341946826 -1.0508297422  
C 14.4191936803 -18.2861284390 -3.1172311121  
O 15.8899223623 -13.8221145903 1.3403761153  
O 17.3015620283 -14.3927359915 -0.4707609409  
Na 6.5836074961 -5.4004217728 0.5284079020  
Na 5.9637995733 -14.0224969346 0.4028659057  
Na 18.7932237922 -5.1801234695 -0.3675987501  
Na 19.4473344117 -14.0852752783 -0.3008329743  
H 17.4944022502 -8.8924498967 1.9342114053  
H 17.3692537373 -11.2823862077 2.4417343582  
H 17.4780736542 -9.7798839834 -2.2554437982  
H 17.3188324929 -12.1654753015 -1.7556555705  
H 18.4259430569 -13.4247618022 2.3925778470  
H 16.6458665353 -16.6240639624 -2.0034908174  
H 13.9238462460 -17.4036498704 -3.5324191245  
H 13.9616560688 -19.1759861301 -3.5626009101  
H 15.4681125650 -18.2666607017 -3.4318236814  
H 14.9759746879 -19.5978885884 0.0373604860  
H 14.6740339553 -20.4631983565 -1.4829329752  
H 16.1271252908 -19.4649204022 -1.2955454727  
H 13.5708538549 -15.2585572234 1.7154470290  
H 12.2058797678 -17.8724921601 -1.9210791699  
H 12.4421529118 -19.3652781551 -1.0155450576  
H 13.2257603827 -17.8341060060 2.2240607054  
H 12.8878941668 -19.3360937250 1.3724341496  
H 10.0074906370 -17.9631986392 3.8537185386  
H 11.5670001316 -17.1198177914 3.8097458799  
H 11.5077352028 -18.8810661413 4.0046729439  
H 9.2429431276 -19.3321283500 1.8600056419  
H 10.3345089706 -19.5956146756 0.4952672726  
H 10.6887357377 -20.3363189932 2.0682840994  
H 11.7986312340 -15.3343187101 -1.5164484074  
H 8.7446180734 -16.5060869293 2.2820491739  
H 7.3487651108 -14.4429265492 -2.1814261614

|   |               |                |               |
|---|---------------|----------------|---------------|
| H | 18.9804941694 | -7.8011239171  | -1.8630841866 |
| H | 13.7898605922 | -5.7794740362  | -1.4281972319 |
| H | 16.7766547445 | -4.6277631834  | 2.4369385538  |
| H | 13.8976766559 | -4.0655400061  | 3.9204068299  |
| H | 15.4499593492 | -3.2203683717  | 4.0215745089  |
| H | 13.9456261810 | -2.3064185616  | 4.1473773912  |
| H | 15.2126155309 | -1.5289316682  | 0.6843296035  |
| H | 14.8002170727 | -0.8128910968  | 2.2538332222  |
| H | 16.2572098298 | -1.8031505638  | 2.0872000734  |
| H | 8.9140424034  | -4.5000217244  | -1.9390340094 |
| H | 11.9391111574 | -5.8499510782  | 1.8173564134  |
| H | 11.6971640529 | -3.7724274274  | -3.4313786222 |
| H | 10.1550559383 | -2.9028817312  | -3.3909096101 |
| H | 11.6671749155 | -2.0006639513  | -3.4914410500 |
| H | 13.1133363265 | -1.7743559575  | -0.8926553699 |
| H | 13.3760475127 | -3.2598574803  | -1.8025137947 |
| H | 12.6375169964 | -1.8086724324  | 1.4734308842  |
| H | 9.4437557696  | -1.6673104031  | -1.2853490889 |
| H | 10.9017632034 | -0.6774205507  | -1.4521930342 |
| H | 10.5661956619 | -1.5157807964  | 0.0747212197  |
| H | 12.2753183481 | -3.3073182300  | 2.3203800628  |
| H | 6.6518825030  | -7.9245548453  | 2.0753068807  |
| H | 7.0409829649  | -11.2749739631 | -1.9662934645 |
| H | 7.1096814884  | -8.8765425556  | -1.4036096223 |
| H | 9.2181396490  | -9.7979571877  | 2.2071513036  |
| H | 9.1254162311  | -12.1901893759 | 1.6481380649  |
| N | 10.1075904900 | -8.8290934543  | 5.6576365255  |
| C | 9.3942912908  | -8.6188871247  | 6.7586157723  |
| C | 10.3957370169 | -7.6914841359  | 4.7579146759  |
| C | 10.5562745025 | -10.0895412463 | 5.2921172138  |
| C | 9.0376153526  | -9.6504158895  | 7.6228112494  |
| C | 9.4782018823  | -10.9665038308 | 7.2961488265  |
| C | 10.2426047899 | -11.1376478094 | 6.1342363269  |
| H | 9.0947646090  | -7.5997505187  | 6.9638267349  |

H 10.6192539237 -12.1229252047 5.8925390081  
C 9.1247797253 -12.0181512227 8.1633311836  
H 9.4383584386 -13.0310309998 7.9389315229  
C 8.3895709185 -11.7555346117 9.2900274489  
C 7.9703749699 -10.4485773721 9.6393814838  
C 8.2779651095 -9.3884087233 8.7949887592  
H 8.1356065760 -12.5772757290 9.9485465277  
O 7.2992198947 -10.1627206507 10.7730725242  
C 6.9596480169 -11.2155652026 11.6592351725  
H 6.4216752227 -10.7451238548 12.4802614236  
H 6.3073369455 -11.9512768716 11.1771393633  
H 7.8536461459 -11.7094208321 12.0536196827  
O 7.9700547958 -8.0969897572 9.0197114371  
C 6.6520079127 -7.7514465172 9.4525385302  
H 6.5710697450 -6.6766068212 9.2956388286  
H 5.9015354233 -8.2688325453 8.8470264715  
H 6.5078191546 -7.9899618726 10.5046991855  
C 11.8078283509 -7.7983516974 4.2340864524  
C 11.3145861072 -10.2278540212 4.0606474289  
C 11.9566061670 -9.1062284331 3.5153893150  
H 9.6911415803 -7.7258477285 3.9197250328  
H 10.2311451976 -6.7782403017 5.3305035318  
H 11.9841371668 -6.9671940340 3.5513143214  
H 12.5313559412 -7.7078483120 5.0549098175  
C 11.4099045754 -11.4926392890 3.4298478119  
C 12.1351637602 -11.5617311129 2.2749469242  
C 12.7657049047 -10.4363095184 1.7312150055  
C 12.6991686529 -9.2018233884 2.3374537448  
H 10.8923369583 -12.3686105235 3.7996026624  
H 13.1797841218 -8.3376172915 1.8943649349  
O 12.3248604054 -12.6187137087 1.4679473244  
O 13.3626112880 -10.7623475961 0.5851953581  
C 13.1632179300 -12.1710946503 0.3972913432  
H 12.6473577569 -12.3346096430 -0.5500504867

H 14.1279355625 -12.6759883250 0.4592488580
